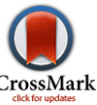

## Correction

# Correction: A Long-Term Assessment of the Variability in Winter Use of Dense Conifer Cover by Female White-Tailed Deer

## The PLOS ONE Staff

Errors occurred during the preparation of this article for publication. Equation Four of the Data Analyses section under the subheading VHF telemetry in the Methods Section is incorrect. The correct equation is  $D = A_0 + A_B \exp(\beta_{B,0} + \beta_{B,S} S_{ij} + \beta_{B,T} T_{ij}) + A_C \exp(\beta_{C,0} + \beta_{C,S} S_{ij} + \beta_{C,T} T_{ij})$

The publisher apologizes for these errors.

## Reference

1. DelGiudice GD, Fieberg JR, Sampson BA (2013) A Long-Term Assessment of the Variability in Winter Use of Dense Conifer Cover by Female White-Tailed Deer. PLoS ONE 8(6): e65368. doi:10.1371/journal.pone.0065368

**Citation:** The PLOS ONE Staff (2014) Correction: A Long-Term Assessment of the Variability in Winter Use of Dense Conifer Cover by Female White-Tailed Deer. PLoS ONE 9(4): e94893. doi:10.1371/journal.pone.0094893

**Published:** April 4, 2014

**Copyright:** © 2014 The PLOS ONE Staff. This is an open-access article distributed under the terms of the Creative Commons Attribution License, which permits unrestricted use, distribution, and reproduction in any medium, provided the original author and source are credited.
